# Supplementary material
Source: PubMed Central journal article supplement (PMC9944250)
Supplement: 42003_2023_4566_MOESM3_ESM.pdf [file 42003_2023_4566_MOESM3_ESM.pdf]

## **Description of Additional Supplementary Files**

**File name:** Supplementary Data 1

**Description:** The Excel spreadsheet contains the raw data for all graphs, including main and supplementary figures.
